# Supplementary material for: Phosphorene hydrogel conduits as “neurotrophin reservoirs” for promoting regeneration of peripheral nerves
Source: Royal Society of Chemistry journal article supplement (doi:10.1039/d3tb00340j), 2023-01-01
Supplement: d3tb00340j1.pdf [file d3tb00340j1.pdf]

## Supporting Information

# Phosphorene hydrogel conduit as a neurotrophin reservoir for promoting peripheral nerve regeneration

*Tiankun Hui, Chen Wang, Liangmin Yu, Chuanli Zhou\* and Meng Qiu\**

T. Hui, C. Wang, M. Qiu

Key Laboratory of Marine Chemistry Theory and Technology (Ocean University of China) Ministry of Education, Qingdao, 266100, P. R. China.

E-mail: mengqiu@ouc.edu.cn

C. Zhou

Department of Spinal Surgery, The Affiliated Hospital of Qingdao University, No. 59 Haier Road, Qingdao, 266000, P. R. China.

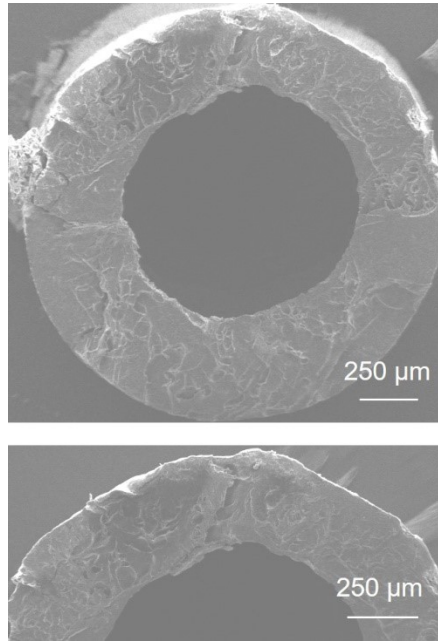

Fig. S1 Scanning electron micrographs of the BP+Nrg1 NGC.

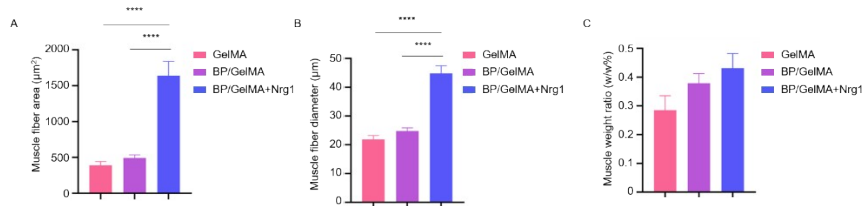

Fig. S2 The statistical results of muscle fiber area, diameter and muscle weight ratio in soleus. (A) The quantification of muscle fiber area. (B) The quantification of muscle diameter. (C) The quantification of muscle weight ratio.

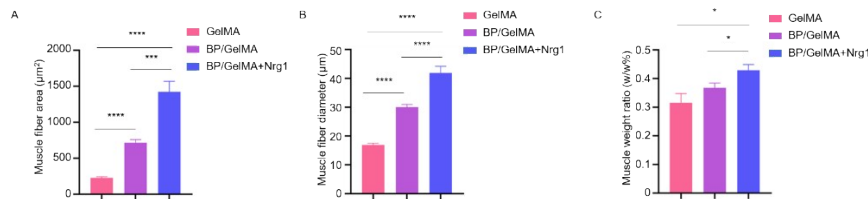

Fig. S3 The statistical results of muscle fiber area, diameter and muscle weight ratio in EDL. (A) The quantification of muscle fiber area. (B) The quantification of muscle diameter. (C) The quantification of muscle weight ratio.

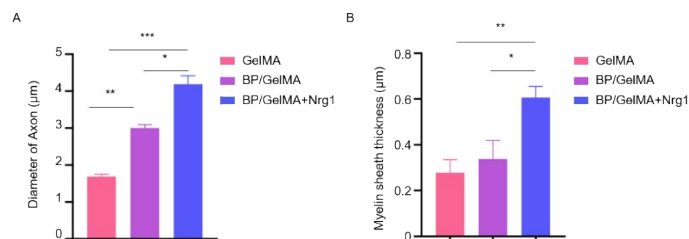

Fig. S4 The quantification of the axon diameter and myelin sheath thickness. (A) The quantification of axon diameter. (B) The quantification of myelin sheath thickness.
